# Supplementary material for: Impact of Maternal Selenium Status on Infant Outcome during the First 6 Months of Life
Source: MDPI journal article supplement (doi:10.3390/nu9050486), 2017-05-11
Supplement: s1 [file s1]

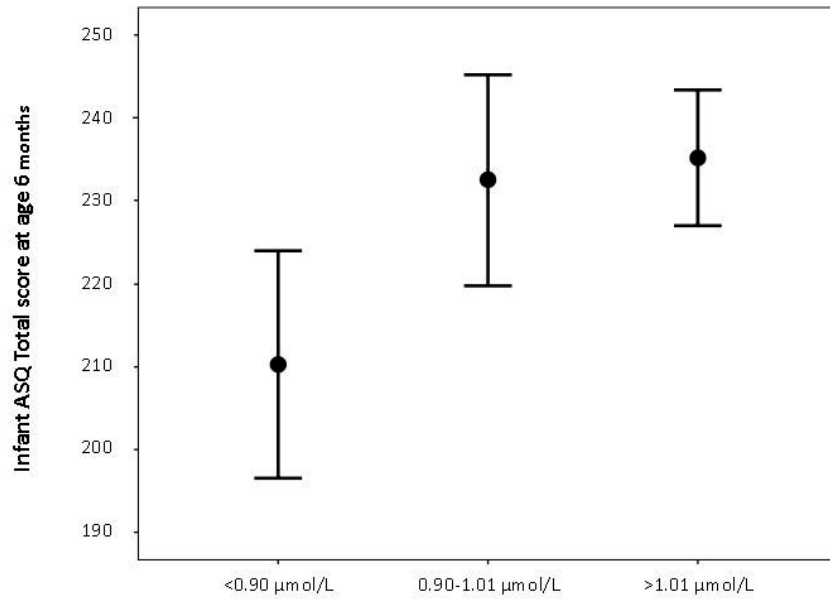

**Figure S1.** Infant ASQ total score (mean  $\pm$  2 SD) at age 6 months in relation to maternal serum selenium levels in pregnancy week 36.

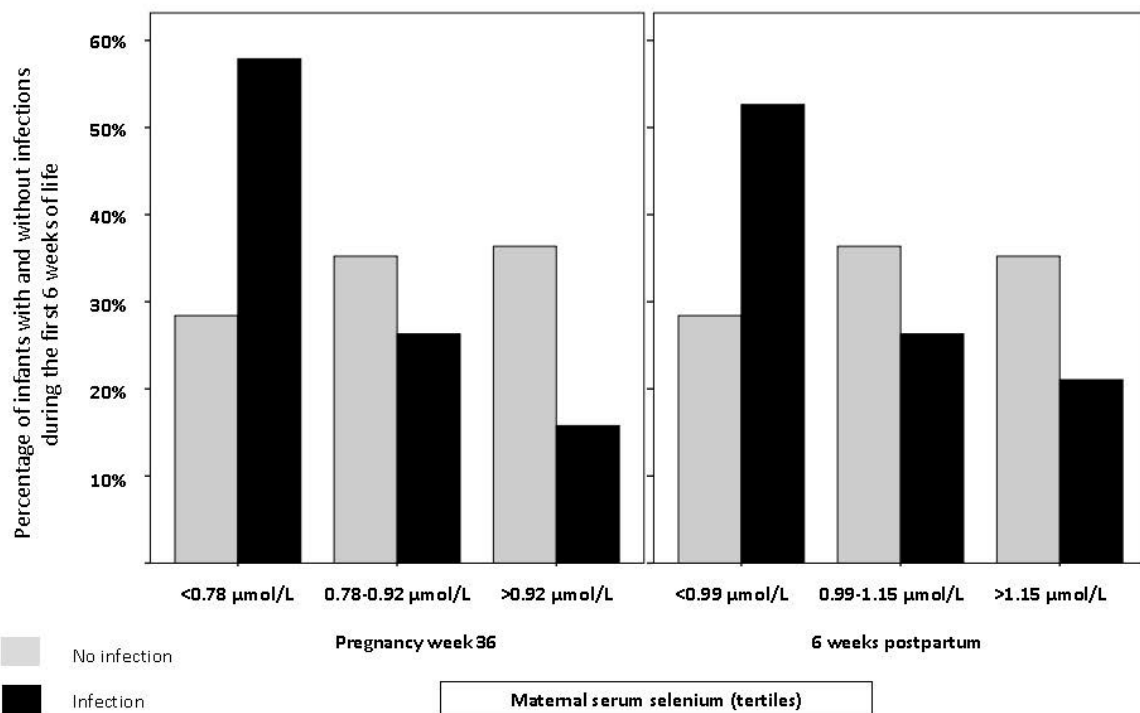

**Figure S2.** Percentage of infants with infection ( $n = 19$ ) and without infection ( $n = 88$ ) during the first 6 weeks of life in relation to maternal serum selenium levels (tertiles) in pregnancy week 36 and 6 weeks postpartum.
